# Supplementary material for: A gold nanoparticle-based label free colorimetric aptasensor for adenosine deaminase detection and inhibition assay
Source: Royal Society of Chemistry journal article supplement (doi:10.1039/c4an02070g), 2015-01-01
Supplement: c4an02070g1.pdf [file c4an02070g1.pdf]

## Electronic supplementary information

### A gold nanoparticle-based label free colorimetric aptasensor for adenosine deaminase detection and inhibition assay

Fen Cheng, Yue He, Xiaojing Xing, Daidi Tan, Yi Lin, Daiwen Pang, and Hongwu Tang\*

\* To whom correspondence should be addressed. Prof. Hongwu Tang, E-mail:

[hwtang@whu.edu.cn](mailto:hwtang@whu.edu.cn) (H.-W. T.), Tel: 86-27-68756759, Fax: 86-27-68754067.

\*Corresponding author:

*Key Laboratory of Analytical Chemistry for Biology and Medicine (Ministry of Education),  
College of Chemistry and Molecular Sciences, Research Center for Nanobiology and  
Nanomedicine (MOE 985 Innovative Platform), and State Key Laboratory of Virology, Wuhan  
University, Wuhan, 430072, P. R. China.*

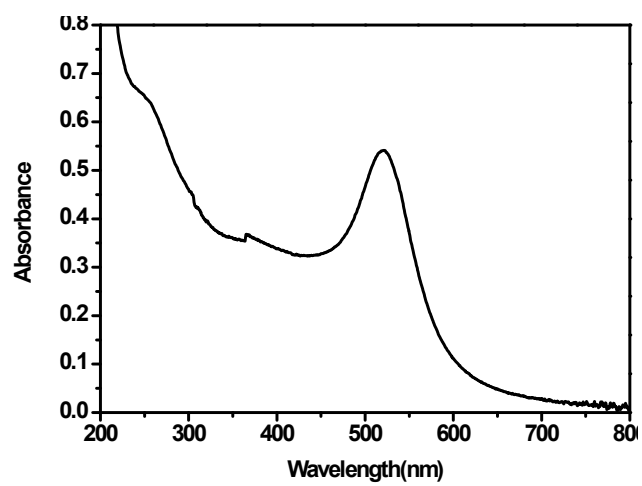

**Figure S1**

Fig. S1 UV-vis absorption spectra of ~13 nm AuNPs.

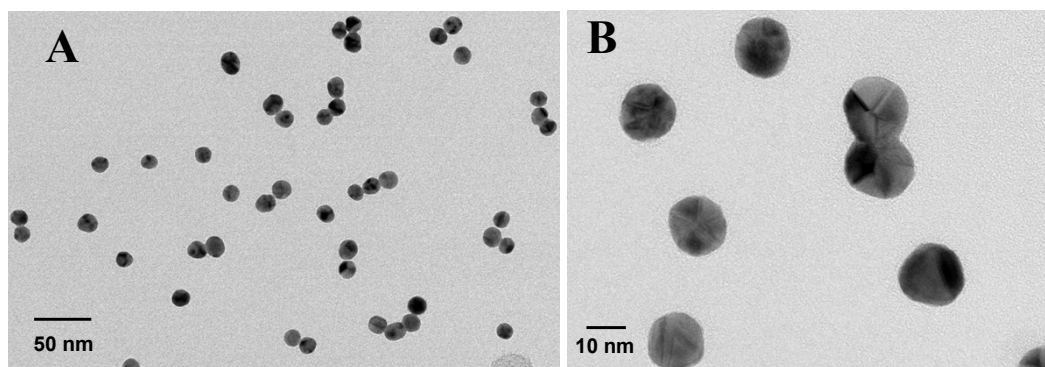

**Figure S2**

Fig. S2 Transmission electron microscopy image of AuNPs stabilized by citrate.

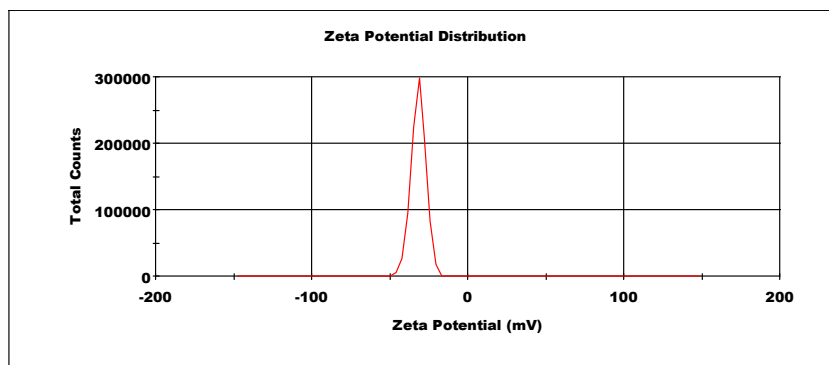

**Figure S3**

Fig. S3 Characterization of surface zeta potential of AuNPs.

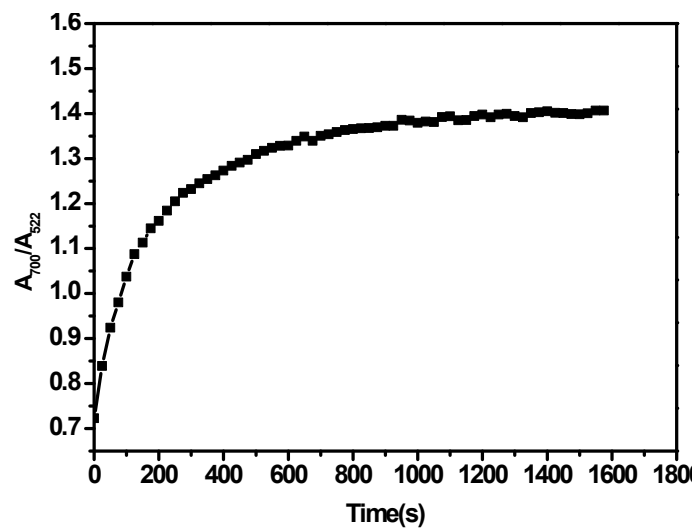

Figure S4

Fig. S4 The dynamic process of AuNPs system after addition of NaCl solution.

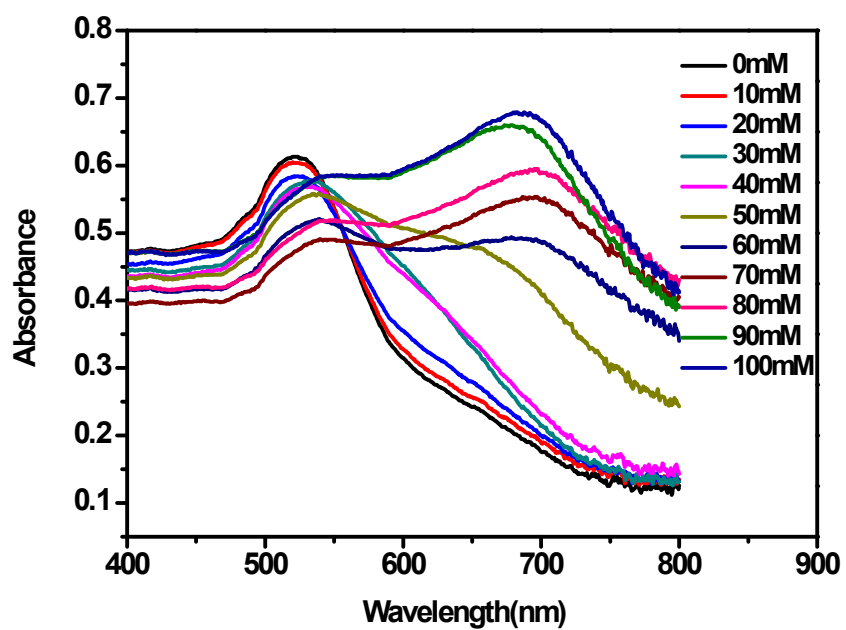

Figure S5

Fig. S5 Absorption spectra of AuNPs system in different concentration of NaCl solution.

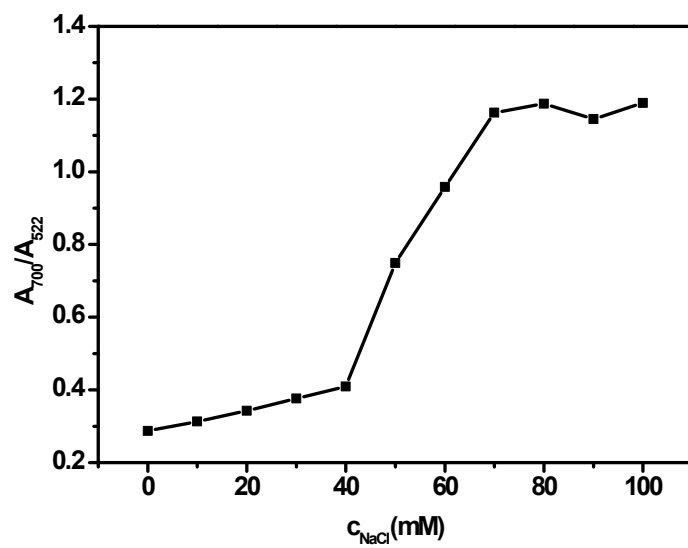

**Figure S6**

Fig. S6 The relation between  $A_{700}/A_{522}$  of the AuNPs system and the concentration of NaCl solution.

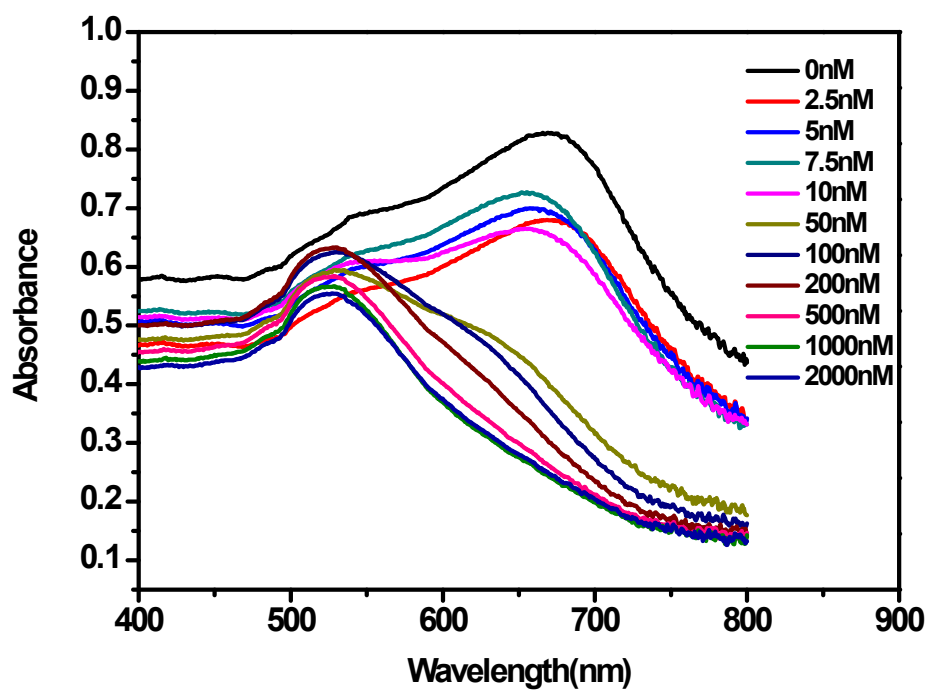

Figure S7

Fig. S7 Absorption spectra of AuNPs system in different concentration of AD aptamer solution.



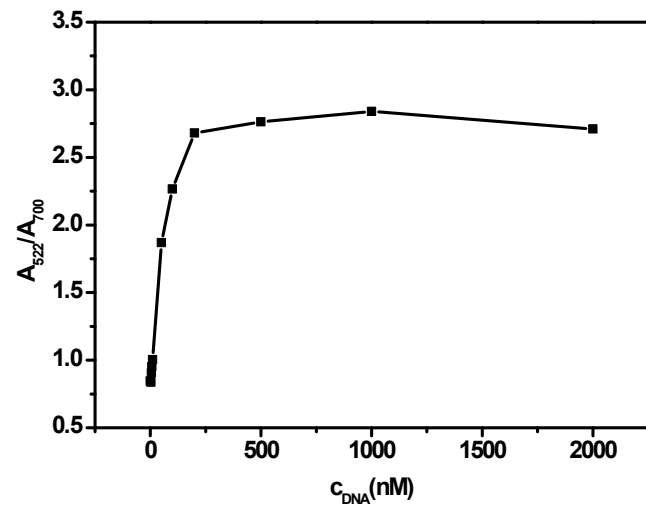

**Figure S8**

Fig.S8 The relation between  $A_{522}/A_{700}$  of the AuNPs system and the concentration of AD aptamer.

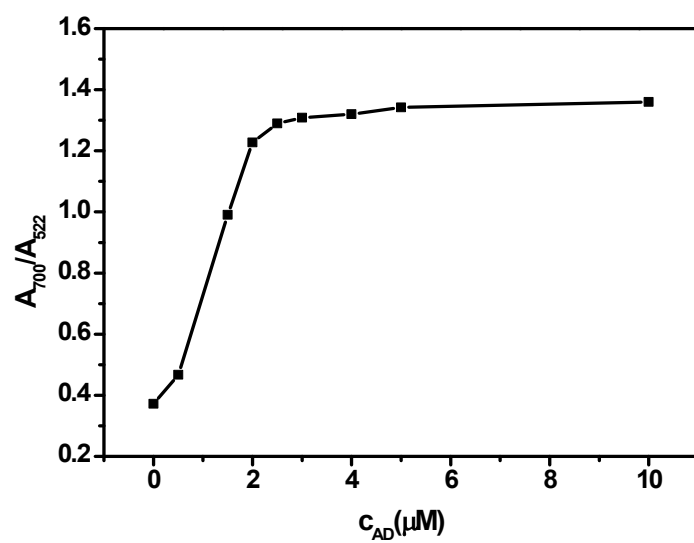

Fig.S9 The relation between  $A_{700}/A_{522}$  of the AuNPs system and the concentration of AD.
